# Supplementary material
Source: PubMed Central journal article supplement (PMC4172398)
Supplement: NIHMS600783-supplement-01.pdf [file NIHMS600783-supplement-01.pdf]

## **Supplemental Information Inventory**

**Figure S1: Multi-lineage reconstitution and self-renewal capacity of early embryonic HSCs.**

**Figure S2: Adult-engrafting subpopulations also engraft neonatal recipients.**

**Figure S3: Proliferating adult-like LT-HSCs.**

**Table S1: Neonatal engraftment from early embryonic HSCs.**

**Supplemental Experimental Procedures**

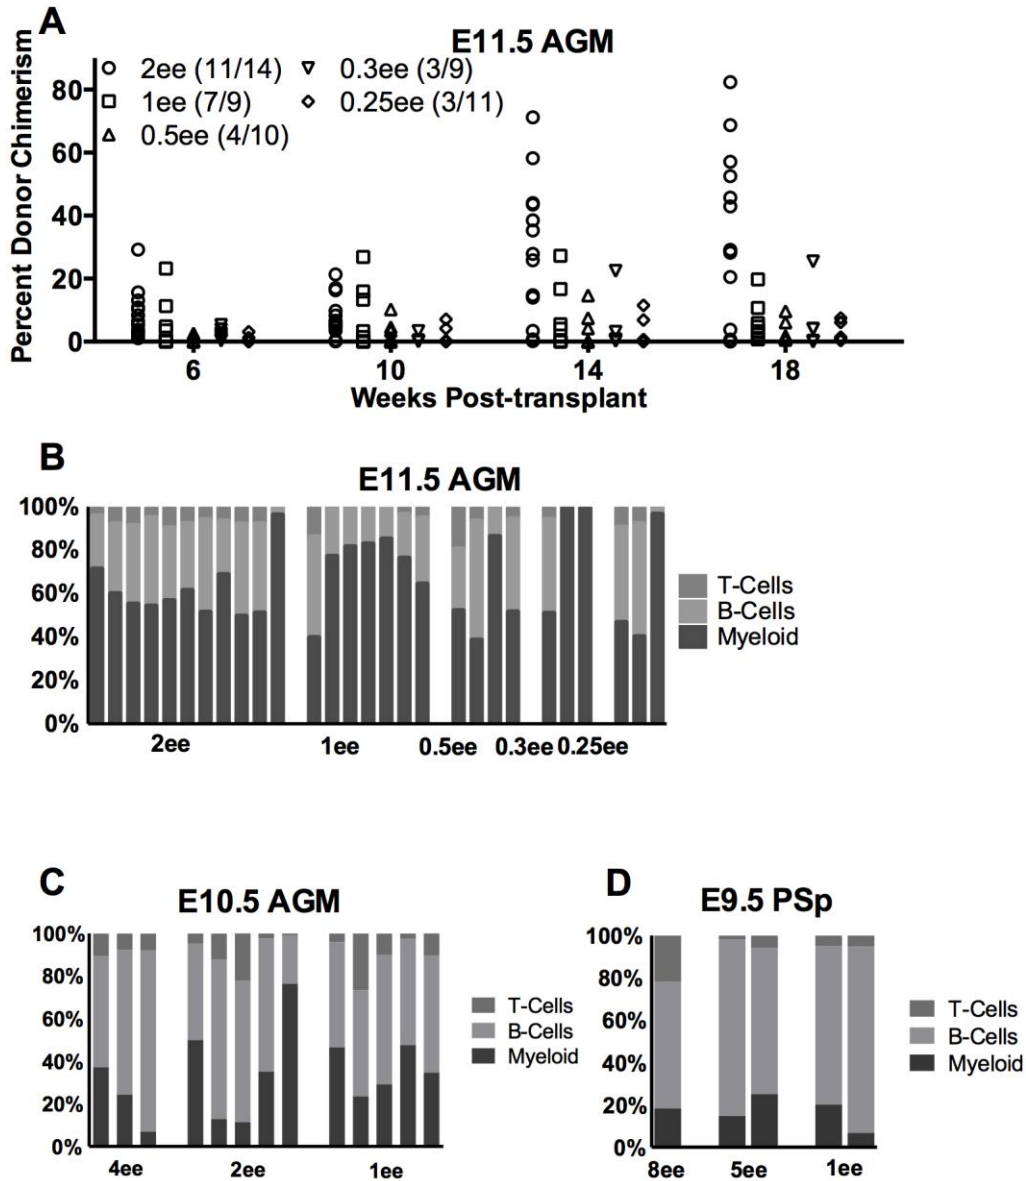

**Figure S1: Multi-lineage reconstitution and self-renewal capacity of early embryonic HSCs, Related to Figure 1.** **A)** Neonatal recipients were transplanted with limiting doses of whole E11.5 AGM. The numbers in the graph legend reflect the number of animals engrafted over the number of animals transplanted. **B)** Lineage breakdown of donor contribution in peripheral blood at 18 weeks post-transplantation for neonates engrafted with E11.5 AGM. Lineage breakdown of donor contribution in peripheral blood at 18 weeks post-transplantation for neonates engrafted with **C)** E10.5 AGM and **D)** E9.5 PSp.

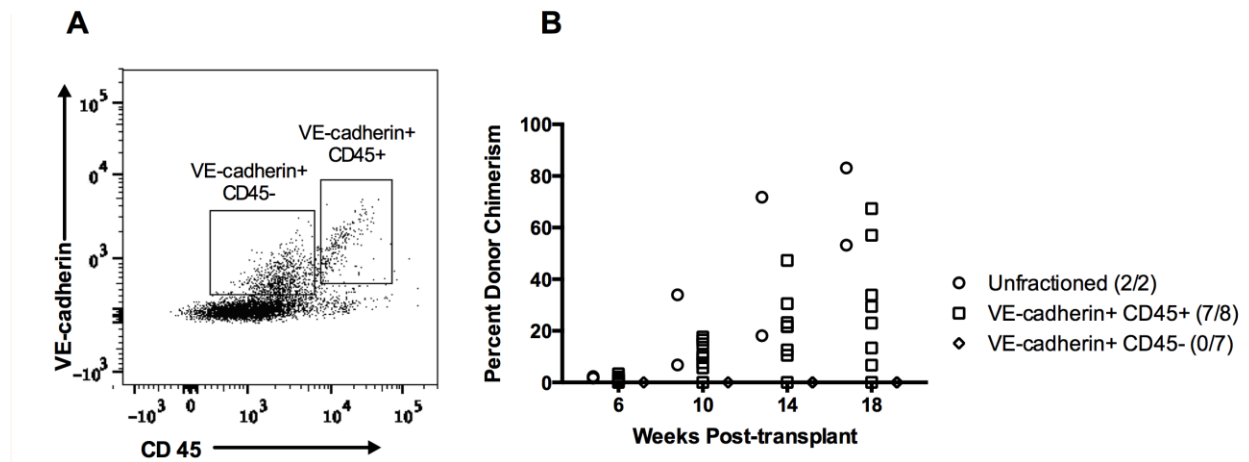

**Figure S2: Adult-engrafting subpopulations also engraft neonatal recipients, Related to Figure 1. A)** FACS plot of E11.5 AGM fractionated by VE-Cadherin and CD45. **B)** Neonatal recipients transplanted with unfractionated, VE-Cadherin<sup>+</sup> CD45<sup>+</sup>, or VE-Cadherin<sup>+</sup> CD45<sup>-</sup> cells from E11.5 AGM. The numbers in the graph legend reflect the number of animals engrafted over the number of animals transplanted.

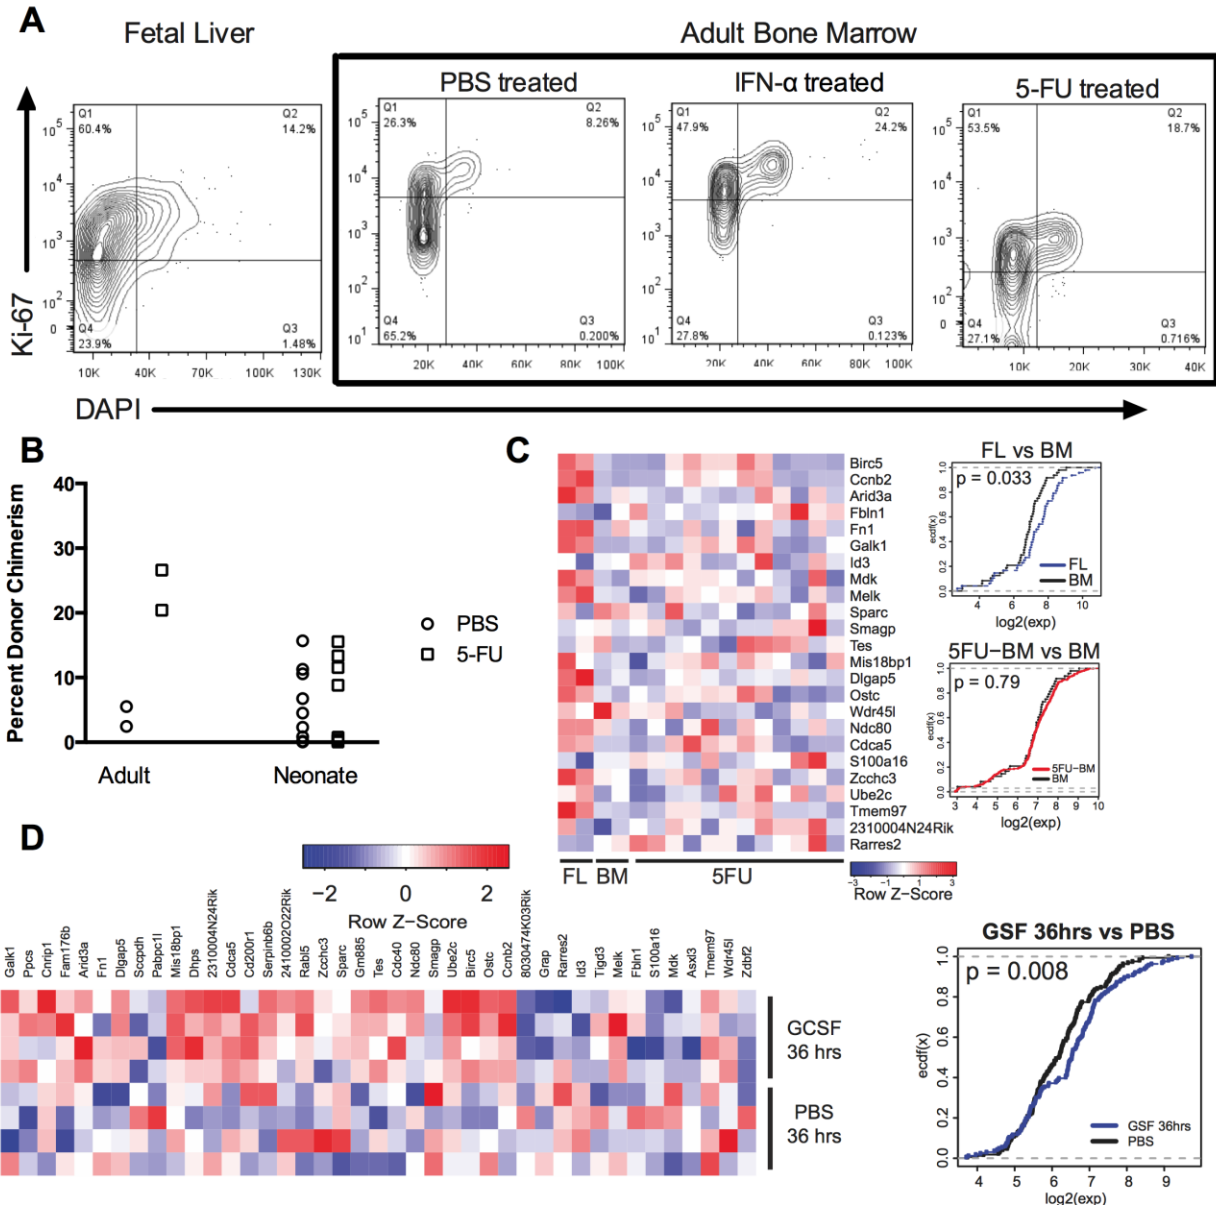

**Figure S3: Proliferating adult-like LT-HSCs, Related to Figure 2.** **A)** FACS plots for Ki-67 and DAPI expression on E14.5 FL LT-HSCs and sorted BM LT-HSCs from IFN $\alpha$  treated, 5-FU treated, or PBS control adult mice. **B)** Neonatal and adult recipients were transplanted with 100 BM LT-HSCs from adult mice treated with 5-FU (squares) or PBS (circles). Data shown are at 14 weeks post-transplantation. The commonly up-regulated genes from Figure 3 C were used in a gene-set enrichment analysis using two-sample Kolmogorov–Smirnov test in the dataset from **C)** Vignezia *et al.* with 5-FU treated HSCs and **D)** Schuettpelez *et al.* with G-CSF treated HSCs.

**Table S1: Neonatal engraftment from early embryonic HSCs, Related to Table 1.**

| Donor          |           | Recipient | Irradiation Dose (Gy) | Number of Animals Engrafted | Number of Animals Transplanted | Percent Animals Engrafted | Average Percent Donor Chimerism | p-value |
|----------------|-----------|-----------|-----------------------|-----------------------------|--------------------------------|---------------------------|---------------------------------|---------|
| E11.5          | 1 ee      | Adult     | 3.5                   | 2                           | 6                              | 33.3                      | 3.4                             | 0.1357  |
|                | 1 ee      | Adult     | 6.5                   | 3                           | 6                              | 50                        | 2.1                             | 0.1223  |
|                | 1 ee      | Adult     | 10                    | 1                           | 8                              | 12.5                      | 34.2                            | 0.015   |
|                | 1 ee      | Neonate   | 3.5                   | 7                           | 9                              | 77.8                      | 6.9                             |         |
| E10.5          | 1 – 7 ee  | Adult     | 10                    | 0                           | 20                             | 0                         | 0                               | 0.0018  |
|                | 1 ee      | Neonate   | 3.5                   | 5                           | 10                             | 50                        | 11                              |         |
| E9.5           |           | Adult     | 10                    | ND                          | ND                             | ND                        | ND                              | ND      |
|                | 1 – 8 ee  | Neonate   | 3.5                   | 5                           | 53                             | 9.4                       | 5.7                             |         |
| Adult BM       | 100 Cells | Adult     | 10                    | 5                           | 5                              | 100                       | 25.4                            | 0.033   |
|                | 100 Cells | Neonate   | 3.5                   | 5*                          | 14                             | 35.7                      | 31.4                            |         |
| E14.5 FL       | 100 Cells | Adult     | 10                    | 6                           | 6                              | 100                       | 77.9                            | 1.44E-6 |
|                | 100 Cells | Neonate   | 3.5                   | 10                          | 16                             | 62.5                      | 22.7                            |         |
| Neonatal BM    | 50 Cells  | Neonate   | 3.5                   | 4                           | 8                              | 50                        | 17.8                            | 0.058   |
| Neonatal Liver | 50 Cells  | Neonate   | 3.5                   | 6                           | 6                              | 100                       | 31.0                            |         |

The threshold for engraftment was drawn at 1%. Percent engraftment was calculated using only engrafted mice. P-values are between neonatal and adult recipients transplanted with the same donor population and calculated using Fisher's exact test, except the p-values for FL HSC transplants, neonatal HSC transplants, and E11.5 AGM transplanted into adult recipients conditioned with 650 rad were calculated using the student's t-test. \*3/5 animals had robust engraftment that was not seen at any other time point up to 23 weeks post-transplant leading us to conclude it may have been a spurious experimental artifact. ND – not determined.
